# Supplementary material for: MoS2 hierarchical hollow cubic cages assembled by bilayers: one-step synthesis and their electrochemical hydrogen storage properties
Source: Royal Society of Chemistry journal article supplement (doi:10.1039/b610601c), 2006-01-01
Supplement: b610601c.pdf [file b610601c.pdf]

## Supporting information

### **MoS<sub>2</sub> Hierarchical Hollow Cubic Cages Assembled by Bilayers: One-step Synthesis and Their Electrochemical Hydrogen Storage Properties**

Lina Ye, Changzheng Wu, Wen Guo, Yi Xie\*

Department of Nanomaterials and Nanochemistry, Hefei National Laboratory for Physical Sciences at Microscale, University of Science and Technology of China, Hefei 230026, P. R. China

#### **S1. FESEM study on the intermediate K<sub>2</sub>NaMoO<sub>3</sub>F<sub>3</sub>**

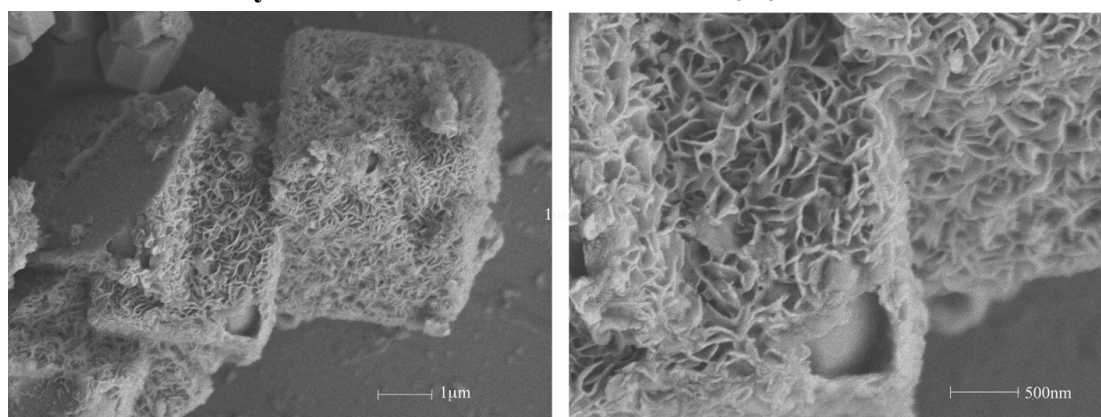

**Figure S1:** low magnification (left) and high magnification (right) FESEM images of a broken sample collected at 220°C for 2.5 h with other experiment conditions unchanged. We can see that a thin loose MoS<sub>2</sub> shell made up of many upstanding nanoplates is clearly covered on the solid K<sub>2</sub>NaMoO<sub>3</sub>F<sub>3</sub> core. Combined with the XRD study (Figure 1B in the text), it can be affirmed that the intermediate K<sub>2</sub>NaMoO<sub>3</sub>F<sub>3</sub> really formed and subsequently sacrificed as the template.

## S2. The formation of the bilayer structure

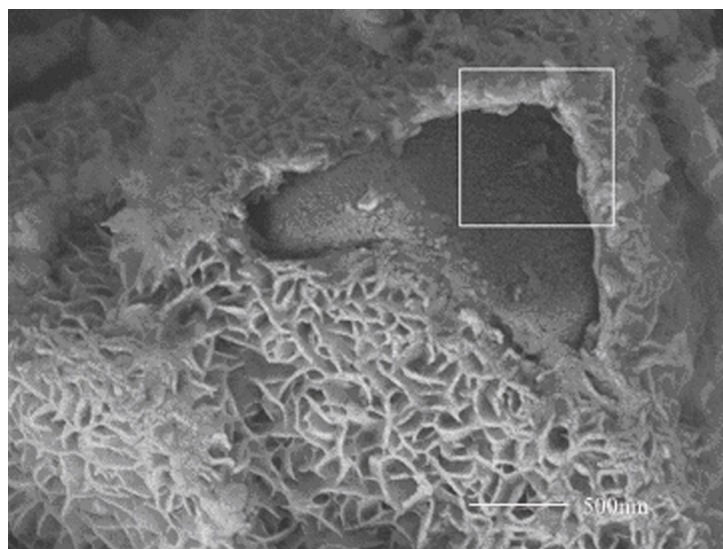

**Figure S2:** FESEM image of a cracked sample collected at 220°C for 2.5 h with other experiment conditions unchanged, from which we can see that the inner layer began to grow on the internal surface of the preformed MoS<sub>2</sub> shell, as shown in the box above.

## S3. MoS<sub>2</sub> products obtained without using NaF or with high-concentration NaF starting solution

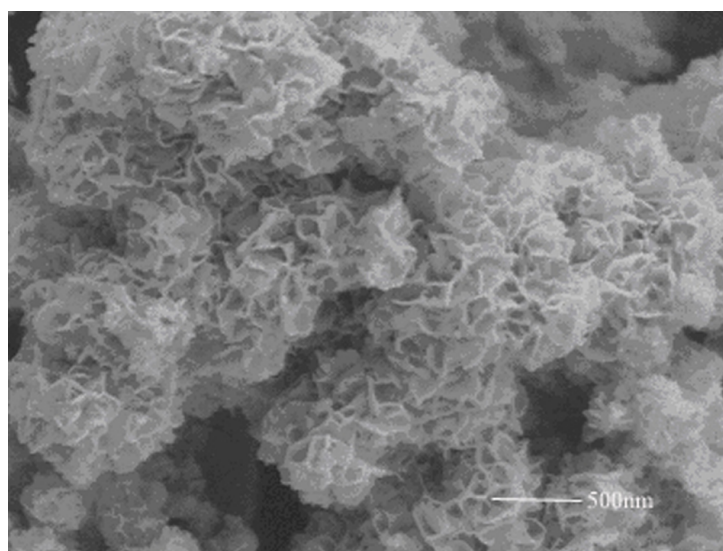

**Figure S3-1:** FESEM image of flower-like MoS<sub>2</sub> assembled by nanoplates obtained at 220°C for 24 h without using initial NaF, showing that introduction of NaF to the starting solution is a prerequisite to form cubic K<sub>2</sub>NaMoO<sub>3</sub>F<sub>3</sub>.

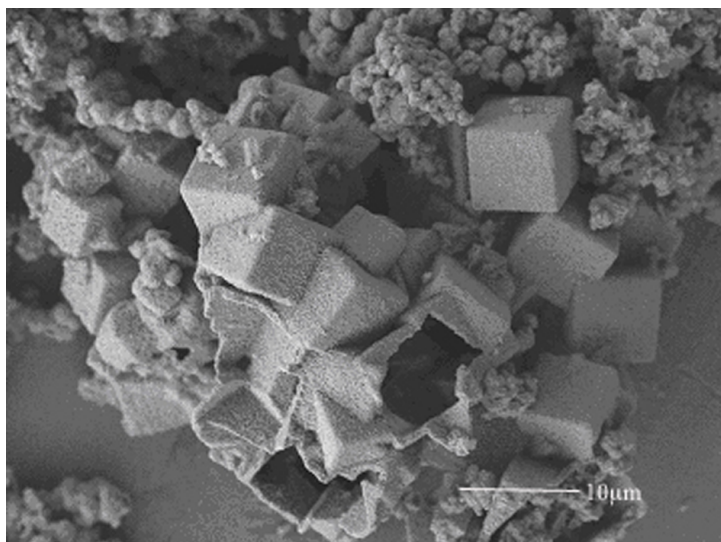

**Figure S3-2:** FESEM image of the larger MoS<sub>2</sub> cubic cages obtained at 220°C for 24 h with high-concentration of initial NaF (0.030mol). Some broken cages confirmed their hollow nature and indicated that the larger MoS<sub>2</sub> cubic cages are easier to collapse.

#### **S4. Charge-discharge hydrogen storage capacity of the MoS<sub>2</sub> electrode at both charge-discharge current of 50 mA/g and 200mA/g**

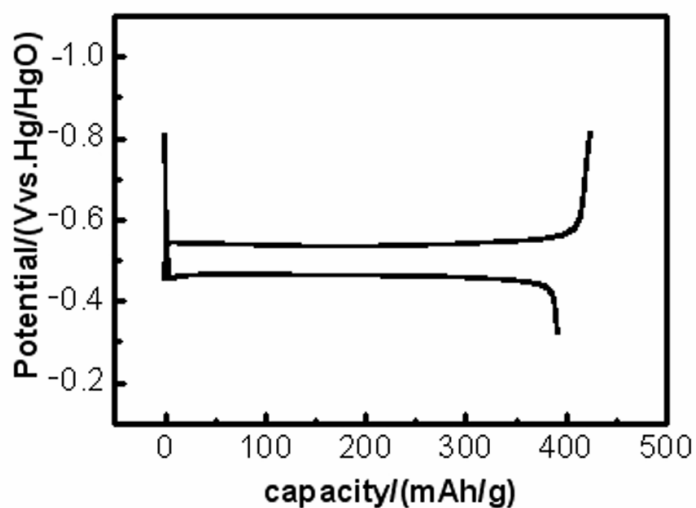

**Figure S4-1** The charge-discharge hydrogen storage curves at a given constant current density of 50mA/g showed an electrochemical charging capacity of 375 mAh/g of the as-prepared MoS<sub>2</sub> cubic cages electrode.

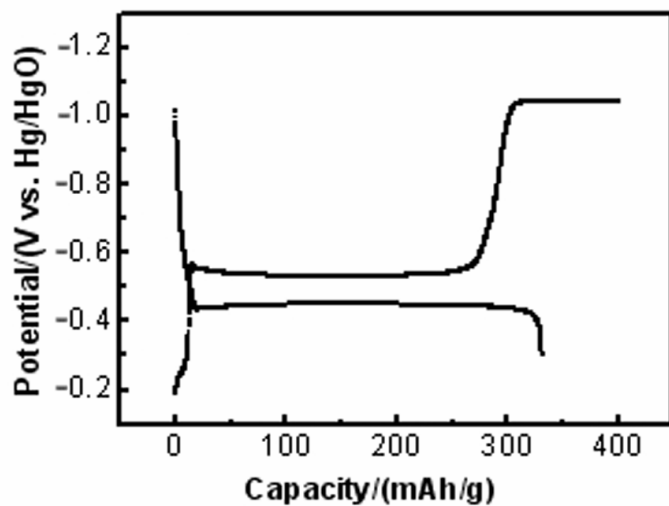

**Figure S4-2:** The charge-discharge hydrogen storage curve at a constant current density of 200 mA/g showed an electrochemical charging capacity of 324 mAh/g of the as-prepared MoS<sub>2</sub> cubic cages, indicating that higher current density resulted in lower electrochemical charging capacity.
